# Supplementary material for: The Selection and Use of Sorghum (Sorghum propinquum) Bacterial Artificial Chromosomes as Cytogenetic FISH Probes for Maize (Zea mays L.)
Source: Hindawi journal article supplement (doi:10.1155/2011/386862), 2010-12-22
Supplement: f1 [file 386862.f1.pdf]

**Supplemental Table 1. Sequenced Maize Probes**

| <b>Probe</b> | <b>Bin<br/>(loci detected)</b>                                                                                 | <b>GenBank<br/>Accession #</b> | <b>Insert Type</b> | <b>Insert<br/>Size (bp)</b> | <b>Vector</b>  |
|--------------|----------------------------------------------------------------------------------------------------------------|--------------------------------|--------------------|-----------------------------|----------------|
| p-asg15      | 3.06 (asg15)                                                                                                   | EF471910                       | Genomic            | 573                         | pGEM3Zf        |
| p-asg16      | 3.02 (asg16a), 1.06 (asg16b)                                                                                   | EF471911                       | Genomic            | 601                         | pGEM3Zf        |
| p-asg18      | 6.07 (asg18)                                                                                                   | EF471912                       | Genomic            | 381                         | pGEM3Zf        |
| p-asg63      | 9.03 (asg63a), 1.09 (asg63b)                                                                                   | EF471913                       | Genomic            | 650                         | pGEM3Zf        |
| p-asg64      | 3.01 (asg64)                                                                                                   | EU728692                       | Genomic            | 786                         | pGEM3Zf        |
| p-asg71      | 5.05 (asg71)                                                                                                   | EU728693                       | Genomic            | 879                         | pGEM3Zf        |
| p-asg72      | 2.07 (asg72)                                                                                                   | EU728694                       | Genomic            | 1098                        | pGEM3Zf        |
| p-asg84      | 2.07 (asg84a), 5.07 (asg84b), 4.07-4.10 (asg84c)                                                               | EF471914                       | Genomic            | 571                         | pGEM3Zf        |
| p-asg85      | 4.08 (asg85a), 5.07 (asg85b)                                                                                   | EU728695                       | Genomic            | 809                         | pGEM3Zf        |
| p-bnl5.07    | 4.10 (bnl15.07a), 7.04 (bnl15.07b)                                                                             | EU445571                       | Genomic            | 2008                        | pUC12          |
| p-bnl5.33    | 4.05 (bnl5.33a), 3.07 (bnl5.33b, EU445567), 9.03 (bnl5.33c), 8.06 (bnl5.33d), 3.04 (bnl5.33e), 7.02 (bnl5.33g) | EU445567                       | Genomic            | 2217                        | pUC12          |
| p-bnl7.13    | 9.04 (bnl7.13a), 7.05 (bnl7.13b)                                                                               | EU445568                       | Genomic            | 1072                        | pUC12          |
| p-bnl7.26    | 3.09 (bnl7.26)                                                                                                 | EU445569                       | Genomic            | 2545                        | pUC12          |
| p-bnl8.44    | 7.05 (bnl8.44a), 2.08 (bnl8.44b)                                                                               | EU445570                       | Genomic            | 2218                        | pUC12          |
| p-bnl944     | 8.03 (bnl9.44)                                                                                                 | EU734556                       | cDNA               | 2223                        | pBluescript-SK |
| p-csu214*    | 9.03-9.04 (csu214a), 1.03 (csu214b)                                                                            | EU734557                       | cDNA               | 525                         | pBluescript-SK |
| p-csu219     | 9.05 (csu219)                                                                                                  | EU734558                       | cDNA               | 783                         | pBluescript-SK |
| p-csu221     | 4.01 (csu221)                                                                                                  | EU328268                       | cDNA               | 756                         | pBluescript-SK |
| p-csu222     | 1.09 (csu222)                                                                                                  | EU734559                       | cDNA               | 360                         | pBluescript-SK |

|          |                                                          |          |      |      |                |
|----------|----------------------------------------------------------|----------|------|------|----------------|
| p-csu230 | 3.02 (csu230)                                            | EU328269 | cDNA | 1850 | pBluescript-SK |
| p-csu252 | 5.03 (csu252a), 9.03-9.04 (csu252b)                      | EU328270 | cDNA | 1372 | pBluescript-SK |
| p-csu266 | 1.11 (csu266)                                            | EU734560 | cDNA | 751  | pBluescript-SK |
| p-csu276 | 10.03 (csu276)                                           | EU328271 | cDNA | 1975 | pBluescript-SK |
| p-csu328 | 3.05 (csu328)                                            | EU734561 | cDNA | 606  | pBluescript-SK |
| p-csu340 | 5.03 (csu340)                                            | EU734562 | cDNA | 527  | pBluescript-SK |
| p-csu348 | 2.02 (csu348a), 2.04 (csu348b)                           | EU328272 | cDNA | 834  | pBluescript-SK |
| p-csu351 | 3.06 (csu351)                                            | EU328273 | cDNA | 640  | pBluescript-SK |
| p-csu359 | 10.01 (csu359)                                           | EU328274 | cDNA | 594  | pBluescript-SK |
| p-csu368 | 8.00-8.01 (csu368)                                       | EU328275 | cDNA | 1017 | pBluescript-SK |
| p-csu377 | 5.04 (csu377b/ubi, EU734563), 4.10 (csu377a/ubi2)        | EU734563 | cDNA | 461  | pBluescript-SK |
| p-csu381 | 1.11 (csu381)                                            | EU734564 | cDNA | 455  | pBluescript-SK |
| p-csu382 | 6.05 (csu382a, EU734565), 8.06 (csu382b), 3.05 (csu382c) | EU734565 | cDNA | 337  | pBluescript-SK |
| p-csu389 | 1.04 (csu389)                                            | EU328276 | cDNA | 1044 | pBluescript-SK |
| p-csu408 | 3.04 (csu408)                                            | EU734566 | cDNA | 813  | pBluescript-SK |
| p-csu419 | 5.03 (csu419)                                            | EU328277 | cDNA | 1094 | pBluescript-SK |
| p-csu434 | 5.06 (csu434)                                            | EU734567 | cDNA | 767  | pBluescript-SK |
| p-csu439 | 3.05 (csu439)                                            | EU734568 | cDNA | 674  | pBluescript-SK |
| p-csu440 | 5.06 (csu440)                                            | EU734569 | cDNA | 402  | pBluescript-SK |
| p-csu466 | 9.02 (csu466)                                            | EU328278 | cDNA | 571  | pBluescript-SK |
| p-csu474 | 4.05 (csu474)                                            | EU734570 | cDNA | 408  | pBluescript-SK |
| p-csu475 |                                                          | EU328281 | cDNA | 1083 | pBluescript-SK |
| p-csu481 | 6.05 (csu481)                                            | EU734571 | cDNA | 216  | pBluescript-SK |
| p-csu486 | 9.02 (csu486a), 7.01 (csu486b)                           | EU328279 | cDNA | 1084 | pBluescript-SK |
| p-csu509 | 4.05 (csu509)                                            | EU734572 | cDNA | 365  | pBluescript-SK |
| p-csu525 | 4.06 (csu525)                                            | EU734573 | cDNA | 442  | pBluescript-SK |
| p-csu536 | 1.11 (csu536)                                            | EU746366 | cDNA | 455  | pBluescript-SK |

|            |                                                                                                                                                                          |          |         |      |                |
|------------|--------------------------------------------------------------------------------------------------------------------------------------------------------------------------|----------|---------|------|----------------|
| p-csu540   | 6.05 (csu540)                                                                                                                                                            | EU746367 | cDNA    | 384  | pBluescript-SK |
| p-csu565   | 9.05 (csu565)                                                                                                                                                            | EU746368 | cDNA    | 387  | pBluescript-SK |
| p-csu567   | 3.07 (csu567)                                                                                                                                                            | EU328280 | cDNA    | 2498 | pBluescript-SK |
| p-csu570   | 1.11 (csu570b), 5.01 (csu570a)                                                                                                                                           | EU746369 | cDNA    | 584  | pBluescript-SK |
| p-csu590   | 1.06 (csu590)                                                                                                                                                            | EU328282 | cDNA    | 748  | pBluescript-SK |
| p-csu598   | 5.05 (csu598)                                                                                                                                                            | EU746370 | cDNA    | 737  | pBluescript-SK |
| p-csu604   | 1.11 (csu604a, EU746371), 5.01 (csu604b)                                                                                                                                 | EU746371 | cDNA    | 701  | pBluescript-SK |
| p-csu606   | 4.01 (csu606)                                                                                                                                                            | EU746372 | cDNA    | 285  | pBluescript-SK |
| p-csu610   | 10.04 (csu610)                                                                                                                                                           | EU746373 | cDNA    | 447  | pBluescript-SK |
| p-csu613   | 10.04 (csu613)                                                                                                                                                           | EU328283 | cDNA    | 600  | pBluescript-SK |
| p-csu614   | 1.07 (csu614)                                                                                                                                                            | EU746374 | cDNA    | 336  | pBluescript-SK |
| p-csu615   | 5.06 (csu615a), 10.06 (csu615b)                                                                                                                                          | EU328284 | cDNA    | 1604 | pBluescript-SK |
| p-G21B-04  | 9.01 (npi253a), 4.08 (npi253b), 5.07 (npi253c),<br>6.04 (npi253d), 8.00-8.09 (npi253e), 10.00-10.07<br>(npi253f)                                                         | EU746375 | Genomic | 529  | pUC19          |
| p-G21G-09  | 4.05 (G21G-09)                                                                                                                                                           | EU728673 | Genomic | 1494 | pUC19          |
| p-npi294   | 2.09 (npi294a), 7.02 (npi294b), 6.05 (npi294c),<br>2.09 (npi294d), 7.02 (npi294e), 8.04 (npi294f),<br>4.09 (npi294g), 10.04 (npi294h), 1.12 (npi294i),<br>4.01 (npi294j) | EU746376 | Genomic | 594  | pUC19          |
| p-php10005 | 9.01 (php10005)                                                                                                                                                          | EU728674 | Genomic | 771  | pUC19          |
| p-php10012 | 2.04 (php10012)                                                                                                                                                          | EU746377 | Genomic | 613  | pUC19          |
| p-php20644 | 1.06 (php20644)                                                                                                                                                          | EU728675 | Genomic | 1700 | pUC19          |
| p-umc1     | 5.03 (umc1)                                                                                                                                                              | EU728676 | Genomic | 1111 | pUC19          |
| p-umc10    | 3.04 (umc10a), 2.08 (umc10b), 4.11(umc10c)                                                                                                                               | EU728678 | Genomic | 1060 | pUC19          |
| p-umc104   | 4.07 (umc104a), 5.08 (umc104b), 1.06 (umc104c)                                                                                                                           | EU728686 | Genomic | 769  | pUC19          |
| p-umc106   | 1.10 (umc106a), 5.02 (umc106b)                                                                                                                                           | EU728687 | Genomic | 754  | pUC19          |
| p-umc12    | 8.05 (umc12a), 2.08-09 (umc12b), 4.07-08<br>(umc12c), 3.05 (umc12d), 6.01 (umc12e), 10.07<br>(umc12f), 1.09 (umc12g), 5.02 (umc12h)                                      | EU746378 | Genomic | 586  | pUC19          |

|          |                                                                  |          |         |      |       |
|----------|------------------------------------------------------------------|----------|---------|------|-------|
| p-umc121 | 3.01 (umc121)                                                    | EU746381 | Genomic | 342  | pUC19 |
| p-umc125 | 2.08 (umc125a), 7.04 (umc125b)                                   | EU728688 | Genomic | 1061 | pUC19 |
| p-umc135 | 2.04 (umc135)                                                    | EU728689 | Genomic | 851  | pUC19 |
| p-umc148 | 9.01 (umc148)                                                    | AY642962 | Genomic | 529  | pUC19 |
| p-umc154 | 3.04 (umc154)                                                    | EU728690 | Genomic | 743  | pUC19 |
| p-umc164 | 8.07 (umc164a), 3.07 (umc164b), 1.01 (umc164c)                   | EU728691 | Genomic | 1275 | pUC19 |
| p-umc18  | 3.05 (umc18a), 10.03 (umc18b)                                    | EU728679 | Genomic | 867  | pUC19 |
| p-umc35  | 7.05 (umc35a), 2.09 (umc35b)                                     | EU746379 | Genomic | 626  | pUC19 |
| p-umc36  | 2.09 (umc36a), 2.07 (umc36b), 6.01 (umc36c),<br>8.06-08 (umc36d) | EU746380 | Genomic | 661  | pUC19 |
| p-umc43  | 5.03 (umc43)                                                     | EU728680 | Genomic | 820  | pUC19 |
| p-umc45  | 7.05 (umc45a), 8.02 (umc45b), 10.04 (umc45c)                     | EU728681 | Genomic | 911  | pUC19 |
| p-umc61  | 2.03 (umc61)                                                     | EU728682 | Genomic | 1039 | pUC19 |
| p-umc8   | 1.03 (umc8a), 2.04 (umc8b), 2.05 (umc8g)                         | EU728677 | Genomic | 1148 | pUC19 |
| p-umc80  | 7.04 (umc80a), 2.08 (umc80b)                                     | EU728683 | Genomic | 821  | pUC19 |
| p-umc84  | 1.11 (umc84a), 5.00 (umc84b), 8.06 (umc84c)                      | EU728684 | Genomic | 1035 | pUC19 |
| p-umc98  | 2.06-2.07 (umc98a), 7.02 (umc98b)                                | EU728685 | Genomic | 1194 | pUC19 |

\* All csu clones are B73 cDNAs from a library as described by Keith et al., *Plant Physiology*, vol. 101: pp. 329–332, 1993.
